# Supplementary material for: Determination of Toxic Elements and Arsenic Species in Salted Foods and Sea Salt by ICP–MS and HPLC–ICP–MS
Source: PubMed Central journal article supplement — ACS Omega. 2021 Jul 19;6(30):19427–34. doi: 10.1021/acsomega.1c01273 (PMC8340090; doi:10.1021/acsomega.1c01273), 2021-07-19
Supplement: ao1c01273_si_001.pdf [file ao1c01273_si_001.pdf]

## **Determination of toxic elements and arsenic species in salted foods and sea-salt by ICP-MS and HPLC-ICP-MS**

In Min Hwang<sup>a</sup>, Hee Min Lee<sup>b</sup>, Hae-Won Lee<sup>a</sup>, Ji-Hye Jung<sup>b</sup>, Eun Woo Moon<sup>b</sup>, Naeem Khan<sup>c</sup>,  
Sung Hyun Kim<sup>b\*</sup>

<sup>a</sup>Hygienic Safety and Analysis Center, World Institute of Kimchi, Gwangju, Republic of Korea

<sup>b</sup>Strategy and Planning Division/SME Service Department, World Institute of Kimchi,  
Gwangju, Republic of Korea

<sup>c</sup>Department of Chemistry, Kohat University of Science and Technology, Kohat 26000, Khyber  
Pakhtunkhwa, Pakistan

\* Corresponding author:

E-mail: [shkim@wikim.re.kr](mailto:shkim@wikim.re.kr)

Tel: +82-62-610-1731

Address: World Institute of Kimchi, 86, kimchi-ro, Nam-gu, Gwangju, 61755, Republic of  
Korea

*E-mail addresses:* [imhwang@wikim.re.kr](mailto:imhwang@wikim.re.kr) (I. M. Hwang), [hmlee@wikim.re.kr](mailto:hmlee@wikim.re.kr) (H. M. Lee),  
[lhwo875@wikim.re.kr](mailto:lhwo875@wikim.re.kr) (H. Lee), [luneeo@wikim.re.kr](mailto:luneeo@wikim.re.kr) (E. W. Moon),  
[naeemkhankust@gmail.com](mailto:naeemkhankust@gmail.com) (N. Khan)

Table S1. ICP-MS operating conditions for determination of toxic elements.

---

| <i>ICP-MS condition</i>   |                                                       |
|---------------------------|-------------------------------------------------------|
| Instrument                | 300D (Perkin Elmer SCIEX, CT, USA)                    |
| Nebulizer                 | Meinhard nebulizer with cyclonic spray chamber        |
| RF power (kW)             | 1.35                                                  |
| Argon flows (L/min)       | Plasma (16.00), Auxiliary (1-1.3), Nebulizer (1-1.07) |
| Analysis mode             | DRC mode, O <sub>2</sub> 0.5 mL/min                   |
| Analytical mass (Isotope) | AsO <sup>+</sup> (91), Cd(111), Pb(208)               |
| Optimisation (Isotope)    | On masses Be(9), Co(59), In(115), and U(238)          |

---

Table S2. HPLC-ICP-MS operating conditions for determination of arsenic species.

|                   |                                                                         |                    |     |     |
|-------------------|-------------------------------------------------------------------------|--------------------|-----|-----|
| Instrument        | Flexar (Perkin Elmer SCIEX, CT, USA)                                    |                    |     |     |
| Column            | Hamilton PRP X-100 (4.1 × 250 mm, 10 μm)                                |                    |     |     |
| Column oven temp. | Room temp.                                                              |                    |     |     |
| Injection volume  | 50 μL                                                                   |                    |     |     |
| Mobile phase      | A : 2M ammonium bicarbonate in 1% MeOH, pH 8.0                          |                    |     |     |
|                   | B : 20 mM ammonium nitrate, 20 mM ammonium phosphate in 1% MeOH, pH 9.2 |                    |     |     |
| Gradient program  | Time (min)                                                              | Flow rate (mL/min) | % A | % B |
|                   | Equilibrium(2.0)                                                        | 1.0                | 100 | 0   |
|                   | 0.0                                                                     | 1.0                | 100 | 0   |
|                   | 2.0                                                                     | 1.0                | 100 | 0   |
|                   | 2.5                                                                     | 1.5                | 0   | 100 |
|                   | 7.5                                                                     | 1.5                | 0   | 100 |

Table S3. Concentrations (mg/kg) of arsenic species in seawater based on sea salt.

|                   | Korea                                                          | Vietnam                                         | China                                           | Australia                                       | New Zealand                                     |
|-------------------|----------------------------------------------------------------|-------------------------------------------------|-------------------------------------------------|-------------------------------------------------|-------------------------------------------------|
| Organic Arsenic   |                                                                |                                                 |                                                 |                                                 |                                                 |
| AsC               | < DL <sup>A</sup>                                              | < DL                                            | < DL                                            | < DL                                            | < DL                                            |
| AsB               | 0.002 <sup>ns B</sup> ± 0.0005 <sup>C</sup><br>(0.002 – 0.003) | 0.002 <sup>ns</sup> ± 0.0001<br>(0.001 – 0.002) | 0.002 <sup>ns</sup> ± 0.0001<br>(0.002 – 0.002) | 0.002 <sup>ns</sup> ± 0.0002<br>(0.002 – 0.002) | 0.002 <sup>ns</sup> ± 0.0001<br>(0.002 – 0.002) |
| DMA               | < DL                                                           | < DL                                            | < DL                                            | < DL                                            | < DL                                            |
| MMA               | < DL                                                           | < DL                                            | < DL                                            | < DL                                            | < DL                                            |
| Inorganic Arsenic |                                                                |                                                 |                                                 |                                                 |                                                 |
| AsIII             | < DL                                                           | < DL                                            | < DL                                            | < DL                                            | < DL                                            |
| AsV               | < DL                                                           | < DL                                            | < DL                                            | < DL                                            | < DL                                            |

<sup>A</sup> DL : below detection limit

<sup>B</sup> ns : non significantly differ within a row( $p < 0.05$ ).

<sup>C</sup> Mean value ± standard deviation
